# Supplementary material
Source: HighWire-hosted journal article supplement (https://erj.ersjournals.com/content/61/5/2201793)

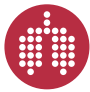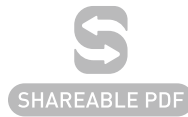

# Minimal clinically important difference for impulse oscillometry in adults with asthma

Mustafa Abdo<sup>1</sup>, Anne-Marie Kirsten<sup>2</sup>, Erika von Mutius<sup>3,4</sup>, Matthias Kopp<sup>5,6</sup>, Gesine Hansen<sup>7</sup>, Klaus F. Rabe<sup>1</sup>, Henrik Watz<sup>2</sup>, Frederik Trinkmann<sup>8,9,11</sup> and Thomas Bahmer<sup>10,11</sup> on behalf of the ALLIANCE study group

<sup>1</sup>LungenClinic Grosshansdorf, Airway Research Center North (ARCN), German Center for Lung Research (DZL), Grosshansdorf, Germany. <sup>2</sup>Pulmonary Research Institute at the LungenClinic Grosshansdorf, Airway Research Center North (ARCN), German Center for Lung Research (DZL), Grosshansdorf, Germany. <sup>3</sup>Dr von Hauner Children's Hospital, Ludwig Maximilian University of Munich, Comprehensive Pneumology Center Munich, German Center for Lung Research (DZL), Munich, Germany. <sup>4</sup>Institute of Asthma and Allergy Prevention, Helmholtz Center, Munich, Germany. <sup>5</sup>Department of Pediatric Respiratory Medicine, Inselspital, University Children's Hospital of Bern, University of Bern, Bern, Switzerland. <sup>6</sup>Division of Pediatric Pneumology and Allergology, University Hospital Schleswig-Holstein – Campus Lübeck, Airway Research Center North (ARCN), German Center for Lung Research (DZL), Lübeck, Germany. <sup>7</sup>Department of Pediatric Pneumology, Allergology and Neonatology, Hannover Medical School, Biomedical Research in Endstage and Obstructive Lung Disease (BREATH), German Center for Lung Research (DZL), Hannover, Germany. <sup>8</sup>Department of Pneumology and Critical Care Medicine, Thoraxklinik, University of Heidelberg, Translational Lung Research Center Heidelberg (TLRC), German Center for Lung Research (DZL), Heidelberg, Germany. <sup>9</sup>Department of Biomedical Informatics, Center for Preventive Medicine and Digital Health Baden-Württemberg (CPD-BW), University Medical Center Mannheim, Heidelberg University, Mannheim, Germany. <sup>10</sup>Department for Internal Medicine I, University Hospital Schleswig-Holstein – Campus Kiel, Airway Research Center North (ARCN), German Center for Lung Research (DZL), Kiel, Germany. <sup>11</sup>These authors contributed equally to this work.

Corresponding author: Mustafa Abdo ([m.abdo@lungenclinic.de](mailto:m.abdo@lungenclinic.de))

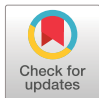

Shareable abstract (@ERSpublications)

**In patients with asthma, small airway function is a distinguished end-point that can be feasibly quantified using the proposed minimal clinically important difference for impulse oscillometry measures** <https://bit.ly/3YjwZkp>

**Cite this article as:** Abdo M, Kirsten A-M, von Mutius E, *et al.* Minimal clinically important difference for impulse oscillometry in adults with asthma. *Eur Respir J* 2023; 61: 2201793 [DOI: 10.1183/13993003.01793-2022].

This single-page version can be shared freely online.

Copyright ©The authors 2023.

This version is distributed under the terms of the Creative Commons Attribution Non-Commercial Licence 4.0. For commercial reproduction rights and permissions contact [permissions@ersnet.org](mailto:permissions@ersnet.org)

Received: 14 Sept 2022  
Accepted: 26 Jan 2023

## Abstract

**Background** Impulse oscillometry (IOS) allows an effort-independent evaluation of small airway function in asthma. Unfortunately, well-determined minimal clinically important differences (MCIDs) for IOS measures are lacking. Here, we provide MCIDs for frequently used IOS measures, namely frequency dependence of resistance (FDR) and area of reactance (AX), in patients with asthma.

**Methods** We performed IOS at baseline and 1 year later in adult patients with mild-to-severe asthma (n=235). In a two-step approach, we first applied a distribution-based method to statistically determine the MCID. Next, we validated the proposed MCID according to patient-reported outcome measures (PROMs): Asthma Quality of Life Questionnaire (AQLQ), Asthma Control Questionnaire-7 (ACQ-7) and Asthma Control Test (ACT). We used multivariable analyses to investigate the proposed MCIDs as predictors for improvements in PROMs compared with the established MCID of forced expiratory volume in 1 s (FEV<sub>1</sub>).

**Results** The proposed MCID was a decline of  $\geq 0.06 \text{ kPa}\cdot\text{L}^{-1}\cdot\text{s}^{-1}$  and  $\geq 0.65 \text{ kPa}\cdot\text{L}^{-1}$  for FDR and AX, respectively. Patients who had changes beyond the MCIDs for both FDR and AX showed greater improvements in all PROMs than those who had not. The mean improvements in PROMs were beyond the established MCIDs for ACQ-7 and AQLQ, and approximated the MCID for ACT. Multivariable analyses demonstrated the MCIDs for both FDR and AX as independent predictors for the MCIDs of all PROMs. The MCID for FDR was a stronger predictor of all PROMs than the MCID for FEV<sub>1</sub>.

**Conclusions** This study provides MCIDs for IOS-derived measures in adult patients with asthma and emphasises that small airway function is a distinguished end-point beyond the conventional measure of FEV<sub>1</sub>.

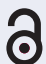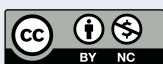

Supplement: inline-supplementary-material-1 [file inline-supplementary-material-1.pdf]
